# Supplementary material for: New Insights into 1-Aminocyclopropane-1-Carboxylate (ACC) Deaminase Phylogeny, Evolution and Ecological Significance
Source: PLoS One. 2014 Jun 6;9(6):e99168. doi: 10.1371/journal.pone.0099168 (PMC4048297; doi:10.1371/journal.pone.0099168)
Supplement: File S1 — Evolutionary distances estimates of acdS and 16S rRNA genes from several bacterial groups. (XLSX) [file pone.0099168.s003.xlsx]

## Sheet: distance estimates
					acdS	S.E			16S	S.E			Ratio
				Bradyrhizobium japonicum	0.0480311	0.00631133		Bradyrhizobium japonicum	0.00403233	0.00153879			11.9115
				Rhizobium leguminosarum	0.00856431	0.00245963		Rhizobium leguminosarum	0.00230412	0.00112983			3.71695
				Sinorhizobium meliloti	0.00130901	0.000910152		Sinorhizobium meliloti	0	0			0
				Mesorhizobium	0.141284	0.011033		Mesorhizobium	0.0150926	0.00315696			9.36114
				Burkholderia mallei	0	0		Burkholderia mallei	0	0			0
				Burkholderia silvatlantica	0.00593563	0.00202555		Burkholderia silvatlantica	0	0			0
				Variovorax paradoxus	0.0935281	0.00818085		Variovorax paradoxus	0.00389992	0.00150389			23.9821
				Pseudomonas syringae	0.0921833	0.00810905		Pseudomonas syringae	0.00380297	0.00285665			24.2398
				Pseudomonas putida	0.00131618	0.000868151		Pseudomonas putida	0.0134746	0.0036525			0.0976781
				Dickeya dadantii	0.15058	0.0108514		Dickeya dadantii	0.0277395	0.00372904			5.42835

## Sheet: Groups 
	Cluster	acdS in replicon	Origin	habitat	Caractheristics
	P. putida cluster
	P. sp. UW4	C	Canada	Rhizosphere	PGPB
	P. putida AM15	n.a	India	Rhizosphere	PGPB
	P. putida AKMP47	n.a	India	Rhizosphere	PGPB
	D. dadantii cluster
	Dickeya dadantii 3937	C	France	endophytic/epyphtic	Plant pathogen
	Dickeya dadantii Ech586	C	n.a	endophytic/epyphtic	Plant pathogen
	Dickeya dadantii Ech703	C	n.a	endophytic/epyphtic	Plant pathogen
	Bradyrhizobium japonicum cluster
	Bradyrhizobium japonicum CCBAU 15354	?	China	Glycine max/Soil	PGPB/symbiotic
	Bradyrhizobium japonicum USDA 6	C	Japan	Glycine max/Soil	PGPB/symbiotic
	Bradyrhizobium japonicum USDA110	C	USA	Glycine max/Soil	PGPB/symbiotic
	Mesorhizobium cluster
	Mesorhizobium amorphae CCNWGS0123	n.a	China	Robinia pseudoacacia	PGPB/symbiotic
	Mesorhizobium ciceri bv. biserrulae WSM1271	C/S.I	Italy	Biserula pelecinus	PGPB/symbiotic
	Mesorhizobium loti MAFF303099	C/S.I	Japan	Lotus japonicus	PGPB/symbiotic
	Rhizobium leguminosarum cluster
	Rhizobium leguminosarum bv. viciae 3841	P	UK	Soil/ Vicia	PGPB/symbiotic
	Rhizobium leguminosarum PB62	n.a	Canada	Lathyrus venosus/soil	PGPB/symbiotic
	Rhizobium leguminosarum PB171	n.a	Canada	Vicia americana	PGPB/symbiotic
	Sinorhizobium meliloti cluster
	Sinorhizobium meliloti AK83	P	Kazakhstan	Soil	PGPB/symbiotic
	Sinorhizobium meliloti BL225C	P	Italy	Soil	PGPB/symbiotic
	Sinorhizobium meliloti SM11	P	Germany	Soil	PGPB/symbiotic
	Burkholderia mallei cluster
	Burkholderia mallei ATCC 23344	C2	Burma	human/animal/soil	human pathogen
	Burkholderia mallei NCTC 10229	C2	Hungary	human/animal/soil	human pathogen
	Burkholderia mallei PRL-20	n.a	Pakistan	human/animal/soil	human pathogen
	Burkholderia silvatlantica cluster
	Burkholderia silvatlantica AB48	n.a	Brazil	Rhizosphere	PGPB
	Burkholderia silvatlantica PPCR-2	n.a	Brazil	Rhizosphere	PGPB
	Burkholderia silvatlantica SRMrh-20	n.a	Brazil	Rhizosphere	PGPB
	Variovorax paradoxus cluster
	Variovorax paradoxus 5C2	n.a	Russia	Rhizosphere	PGPB
	Variovorax paradoxus EPS	C	USA	Rhizosphere	PGPB
	Variovorax paradoxus S110	C	USA	Rhizosphere	PGPB
	Pseudomomas syringae cluster
	P. syringae pv. phaseolicola 1448A	C	Ethiopia	P. vulgaris/endophytic/epyphtic	Plant pathogen
	P. syringae pv. syringae B728a	C	USA	Bean leaflet/ endophytic/epyphtic	Plant pathogen
	P. syringae pv. tomato DC3000	C	UK	Tomato/ endophytic/epyphtic	Plant pathogen
	n.a- not available
	C- chromosome
	C2- 2nd chromosome
	P- plasmid
	S.I- symbiotic island
